# Supplementary material
Source: MDPI journal article supplement (https://www.mdpi.com/1424-8247/15/6/723)
Supplement: s1 [file s1]

**Table S1.** Comparison of copper-61 activity produced and purified, corrected at EOB and EOP, respectively, when using non-recycled, once recycled, twice recycled, and three times recycled zinc-64 solution (mean  $\pm$  SD, N=8). Isotopic enrichment of the irradiated zinc-64 recycled solution determined by ICP-MS analysis.

|                             | Activity Produced at<br>EOB (GBq) | Activity Purified<br>at EOP (GBq) | Zinc-64 Isotopic<br>Enrichment (%) |
|-----------------------------|-----------------------------------|-----------------------------------|------------------------------------|
| 1 <sup>st</sup> Irradiation | 3.65 $\pm$ 0.18                   | 2.34 $\pm$ 0.16                   | 99.90 $\pm$ 0.01                   |
| 2 <sup>nd</sup> Irradiation | 3.43 $\pm$ 0.26                   | 2.22 $\pm$ 0.19                   | 99.89 $\pm$ 0.01                   |
| 3 <sup>rd</sup> Irradiation | 3.09 $\pm$ 0.34                   | 2.09 $\pm$ 0.22                   | 99.88 $\pm$ 0.01                   |
| 4 <sup>th</sup> Irradiation | 2.94 $\pm$ 0.41                   | 2.00 $\pm$ 0.39                   | 99.81 $\pm$ 0.12                   |

EOB: End of Beam

EOP: End of Purification
